# Supplementary material for: Comparative Transcriptome Analysis Reveals Differential Regulation of Flavonoids Biosynthesis Between Kernels of Two Pecan Cultivars
Source: Front Plant Sci. 2022 Feb 25;13:804968. doi: 10.3389/fpls.2022.804968 (PMC8914201; doi:10.3389/fpls.2022.804968)
Supplement: Supplementary Table 2 — Genes related to phenylalanine metabolism and flavonoid biosynthesis pathways in profile 1 of “Oconee.” [file Table_2.XLSX]

## Sheet: Sheet1
id	Oconee Profile	YLC 28 Profile	Description	KEGG_A_class	KEGG_B_class	Pathway
CIL0203S0006	1	3	PREDICTED: dihydroflavonol-4-reductase-like [Juglans regia]	Metabolism;Metabolism;Metabolism	Global and overview maps;Global and overview maps;Biosynthesis of other secondary metabolites	ko01100//Metabolic pathways;ko01110//Biosynthesis of secondary metabolites;ko00941//Flavonoid biosynthesis
CIL0301S0006	1	3	PREDICTED: probable chalcone--flavonone isomerase 3 [Juglans regia]	Metabolism;Metabolism;Metabolism	Global and overview maps;Global and overview maps;Biosynthesis of other secondary metabolites	ko01100//Metabolic pathways;ko01110//Biosynthesis of secondary metabolites;ko00941//Flavonoid biosynthesis
CIL0320S0016	1	12	PREDICTED: trans-cinnamate 4-monooxygenase-like isoform X1 [Juglans regia]	Metabolism;Metabolism;Metabolism;Metabolism;Metabolism;Metabolism;Metabolism	Global and overview maps;Global and overview maps;Biosynthesis of other secondary metabolites;Biosynthesis of other secondary metabolites;Amino acid metabolism;Biosynthesis of other secondary metabolites;Metabolism of cofactors and vitamins	ko01100//Metabolic pathways;ko01110//Biosynthesis of secondary metabolites;ko00940//Phenylpropanoid biosynthesis;ko00941//Flavonoid biosynthesis;ko00360//Phenylalanine metabolism;ko00945//Stilbenoid, diarylheptanoid and gingerol biosynthesis;ko00130//Ubiquinone and other terpenoid-quinone biosynthesis
CIL0475S0002	1	12	PREDICTED: primary amine oxidase-like [Juglans regia]	Metabolism;Metabolism;Metabolism;Metabolism;Metabolism;Metabolism;Metabolism;Metabolism	Global and overview maps;Global and overview maps;Amino acid metabolism;Amino acid metabolism;Amino acid metabolism;Metabolism of other amino acids;Biosynthesis of other secondary metabolites;Biosynthesis of other secondary metabolites	ko01100//Metabolic pathways;ko01110//Biosynthesis of secondary metabolites;ko00260//Glycine, serine and threonine metabolism;ko00360//Phenylalanine metabolism;ko00350//Tyrosine metabolism;ko00410//beta-Alanine metabolism;ko00950//Isoquinoline alkaloid biosynthesis;ko00960//Tropane, piperidine and pyridine alkaloid biosynthesis
CIL0899S0128	1	0	PREDICTED: leucoanthocyanidin reductase-like [Juglans regia]	Metabolism;Metabolism	Global and overview maps;Biosynthesis of other secondary metabolites	ko01110//Biosynthesis of secondary metabolites;ko00941//Flavonoid biosynthesis
CIL0922S0258	1	12	PREDICTED: vinorine synthase-like [Juglans regia]	Metabolism;Metabolism;Metabolism;Metabolism;Metabolism	Global and overview maps;Global and overview maps;Biosynthesis of other secondary metabolites;Biosynthesis of other secondary metabolites;Biosynthesis of other secondary metabolites	ko01100//Metabolic pathways;ko01110//Biosynthesis of secondary metabolites;ko00940//Phenylpropanoid biosynthesis;ko00941//Flavonoid biosynthesis;ko00945//Stilbenoid, diarylheptanoid and gingerol biosynthesis
CIL1020S0081	1	0	PREDICTED: naringenin,2-oxoglutarate 3-dioxygenase [Juglans regia]	Metabolism;Metabolism;Metabolism	Global and overview maps;Global and overview maps;Biosynthesis of other secondary metabolites	ko01100//Metabolic pathways;ko01110//Biosynthesis of secondary metabolites;ko00941//Flavonoid biosynthesis
CIL1032S0007	1	6	PREDICTED: leucoanthocyanidin reductase-like [Juglans regia]	Metabolism;Metabolism	Global and overview maps;Biosynthesis of other secondary metabolites	ko01110//Biosynthesis of secondary metabolites;ko00941//Flavonoid biosynthesis
CIL1057S0030	1	12	PREDICTED: primary amine oxidase-like [Juglans regia]	Metabolism;Metabolism;Metabolism;Metabolism;Metabolism;Metabolism;Metabolism;Metabolism	Global and overview maps;Global and overview maps;Amino acid metabolism;Amino acid metabolism;Amino acid metabolism;Metabolism of other amino acids;Biosynthesis of other secondary metabolites;Biosynthesis of other secondary metabolites	ko01100//Metabolic pathways;ko01110//Biosynthesis of secondary metabolites;ko00260//Glycine, serine and threonine metabolism;ko00360//Phenylalanine metabolism;ko00350//Tyrosine metabolism;ko00410//beta-Alanine metabolism;ko00950//Isoquinoline alkaloid biosynthesis;ko00960//Tropane, piperidine and pyridine alkaloid biosynthesis
CIL1071S0082	1	-	PREDICTED: bifunctional aspartate aminotransferase and glutamate/aspartate-prephenate aminotransferase-like [Juglans regia]	Metabolism;Metabolism;Metabolism;Metabolism;Metabolism;Metabolism;Metabolism;Metabolism	Global and overview maps;Global and overview maps;Global and overview maps;Amino acid metabolism;Amino acid metabolism;Amino acid metabolism;Biosynthesis of other secondary metabolites;Biosynthesis of other secondary metabolites	ko01100//Metabolic pathways;ko01110//Biosynthesis of secondary metabolites;ko01230//Biosynthesis of amino acids;ko00360//Phenylalanine metabolism;ko00400//Phenylalanine, tyrosine and tryptophan biosynthesis;ko00350//Tyrosine metabolism;ko00950//Isoquinoline alkaloid biosynthesis;ko00960//Tropane, piperidine and pyridine alkaloid biosynthesis
CIL1099S0044	1	5	PREDICTED: anthocyanidin reductase [Juglans regia]	Metabolism;Metabolism	Global and overview maps;Biosynthesis of other secondary metabolites	ko01110//Biosynthesis of secondary metabolites;ko00941//Flavonoid biosynthesis
CIL1128S0001	1	0	PREDICTED: vinorine synthase-like [Juglans regia]	Metabolism;Metabolism;Metabolism;Metabolism;Metabolism	Global and overview maps;Global and overview maps;Biosynthesis of other secondary metabolites;Biosynthesis of other secondary metabolites;Biosynthesis of other secondary metabolites	ko01100//Metabolic pathways;ko01110//Biosynthesis of secondary metabolites;ko00940//Phenylpropanoid biosynthesis;ko00941//Flavonoid biosynthesis;ko00945//Stilbenoid, diarylheptanoid and gingerol biosynthesis
CIL1151S0022	1	1	PREDICTED: trans-cinnamate 4-monooxygenase [Juglans regia]	Metabolism;Metabolism;Metabolism;Metabolism;Metabolism;Metabolism;Metabolism	Global and overview maps;Global and overview maps;Biosynthesis of other secondary metabolites;Biosynthesis of other secondary metabolites;Amino acid metabolism;Biosynthesis of other secondary metabolites;Metabolism of cofactors and vitamins	ko01100//Metabolic pathways;ko01110//Biosynthesis of secondary metabolites;ko00940//Phenylpropanoid biosynthesis;ko00941//Flavonoid biosynthesis;ko00360//Phenylalanine metabolism;ko00945//Stilbenoid, diarylheptanoid and gingerol biosynthesis;ko00130//Ubiquinone and other terpenoid-quinone biosynthesis
CIL1158S0044	1	3	PREDICTED: 4-coumarate--CoA ligase 2-like isoform X2 [Juglans regia]	Metabolism;Metabolism;Metabolism;Metabolism;Metabolism	Global and overview maps;Global and overview maps;Biosynthesis of other secondary metabolites;Amino acid metabolism;Metabolism of cofactors and vitamins	ko01100//Metabolic pathways;ko01110//Biosynthesis of secondary metabolites;ko00940//Phenylpropanoid biosynthesis;ko00360//Phenylalanine metabolism;ko00130//Ubiquinone and other terpenoid-quinone biosynthesis
CIL1192S0044	1	3	PREDICTED: 4-coumarate--CoA ligase 2-like [Juglans regia]	Metabolism;Metabolism;Metabolism;Metabolism;Metabolism	Global and overview maps;Global and overview maps;Biosynthesis of other secondary metabolites;Amino acid metabolism;Metabolism of cofactors and vitamins	ko01100//Metabolic pathways;ko01110//Biosynthesis of secondary metabolites;ko00940//Phenylpropanoid biosynthesis;ko00360//Phenylalanine metabolism;ko00130//Ubiquinone and other terpenoid-quinone biosynthesis
CIL1246S0103	1	12	PREDICTED: acetyl-CoA-benzylalcohol acetyltransferase-like [Juglans regia]	Metabolism;Metabolism;Metabolism;Metabolism;Metabolism	Global and overview maps;Global and overview maps;Biosynthesis of other secondary metabolites;Biosynthesis of other secondary metabolites;Biosynthesis of other secondary metabolites	ko01100//Metabolic pathways;ko01110//Biosynthesis of secondary metabolites;ko00940//Phenylpropanoid biosynthesis;ko00941//Flavonoid biosynthesis;ko00945//Stilbenoid, diarylheptanoid and gingerol biosynthesis
CIL1380S0021	1	3	PREDICTED: chalcone synthase 2 [Juglans regia]	Metabolism;Metabolism;Metabolism;Organismal Systems	Global and overview maps;Global and overview maps;Biosynthesis of other secondary metabolites;Environmental adaptation	ko01100//Metabolic pathways;ko01110//Biosynthesis of secondary metabolites;ko00941//Flavonoid biosynthesis;ko04712//Circadian rhythm - plant
CIL1399S0001	1	3	PREDICTED: chalcone synthase 1-like [Juglans regia]	Metabolism;Metabolism;Metabolism;Organismal Systems	Global and overview maps;Global and overview maps;Biosynthesis of other secondary metabolites;Environmental adaptation	ko01100//Metabolic pathways;ko01110//Biosynthesis of secondary metabolites;ko00941//Flavonoid biosynthesis;ko04712//Circadian rhythm - plant
CIL1546S0028	1	5	PREDICTED: chalcone--flavonone isomerase-like isoform X1 [Juglans regia]	Metabolism;Metabolism;Metabolism	Global and overview maps;Global and overview maps;Biosynthesis of other secondary metabolites	ko01100//Metabolic pathways;ko01110//Biosynthesis of secondary metabolites;ko00941//Flavonoid biosynthesis
CIL1549S0032	1	3	PREDICTED: chalcone synthase 1 [Juglans regia]	Metabolism;Metabolism;Metabolism;Organismal Systems	Global and overview maps;Global and overview maps;Biosynthesis of other secondary metabolites;Environmental adaptation	ko01100//Metabolic pathways;ko01110//Biosynthesis of secondary metabolites;ko00941//Flavonoid biosynthesis;ko04712//Circadian rhythm - plant
MSTRG.21059	1	12	Amidase domain-containing protein [Cephalotus follicularis]	Metabolism;Metabolism;Metabolism	Amino acid metabolism;Amino acid metabolism;Amino acid metabolism	ko00360//Phenylalanine metabolism;ko00330//Arginine and proline metabolism;ko00380//Tryptophan metabolism
MSTRG.21061	1	16	Amidase domain-containing protein [Cephalotus follicularis]	Metabolism;Metabolism;Metabolism	Amino acid metabolism;Amino acid metabolism;Amino acid metabolism	ko00360//Phenylalanine metabolism;ko00330//Arginine and proline metabolism;ko00380//Tryptophan metabolism
MSTRG.33991	1	16	PREDICTED: caffeoyl-CoA O-methyltransferase [Juglans regia]	Metabolism;Metabolism;Metabolism;Metabolism;Metabolism;Metabolism	Global and overview maps;Global and overview maps;Biosynthesis of other secondary metabolites;Biosynthesis of other secondary metabolites;Amino acid metabolism;Biosynthesis of other secondary metabolites	ko01100//Metabolic pathways;ko01110//Biosynthesis of secondary metabolites;ko00940//Phenylpropanoid biosynthesis;ko00941//Flavonoid biosynthesis;ko00360//Phenylalanine metabolism;ko00945//Stilbenoid, diarylheptanoid and gingerol biosynthesis
