# Supplementary material for: Comparative Transcriptome Analysis Reveals Differential Regulation of Flavonoids Biosynthesis Between Kernels of Two Pecan Cultivars
Source: Front Plant Sci. 2022 Feb 25;13:804968. doi: 10.3389/fpls.2022.804968 (PMC8914201; doi:10.3389/fpls.2022.804968)
Supplement: Supplementary Table 3 — The information of flavonoid-related genes. [file Table_3.XLSX]

## Sheet: Sheet1
gene_id	DEG (y/n)	L100-1_fpkm	L100-2_fpkm	L100-3_fpkm	L114-1_fpkm	L114-2_fpkm	L114-3_fpkm	L121-1_fpkm	L121-2_fpkm	L121-3_fpkm	L135-1_fpkm	L135-2_fpkm	L135-3_fpkm	L150-1_fpkm	L150-2_fpkm	L150-3_fpkm	H100-1_fpkm	H100-2_fpkm	H100-3_fpkm	H114-1_fpkm	H114-2_fpkm	H114-3_fpkm	H121-1_fpkm	H121-2_fpkm	H121-3_fpkm	H135-1_fpkm	H135-2_fpkm	H135-3_fpkm	H150-1_fpkm	H150-2_fpkm	H150-3_fpkm	Gene	Description	KEGG_A_class	KEGG_B_class	Pathway	K_ID	GO Component	GO Function	GO Process
CIL0194S0001	n	1.45	1.38	0.73	0	0	0	1.75	1.42	1.69	0	1.24	0	5.08	2.81	1.98	0.09	0	0.04	3.5	3.46	3.7	0	0.05	0.07	0	0.09	0	0	0	0	PAL	PREDICTED: phenylalanine ammonia-lyase-like [Juglans regia]	Metabolism;Metabolism;Metabolism;Metabolism	Global and overview maps;Global and overview maps;Biosynthesis of other secondary metabolites;Amino acid metabolism	ko01100//Metabolic pathways;ko01110//Biosynthesis of secondary metabolites;ko00940//Phenylpropanoid biosynthesis;ko00360//Phenylalanine metabolism	K10775;K10775;K10775;K10775	-	-	-
CIL0945S0098	y	47.87	1.33	7.19	0.06	0.03	0.05	1.34	1.81	1.39	0.09	0.36	0.05	2.77	2.28	1.65	0.03	0.07	0.03	22.06	21.18	20.12	0.19	0.15	0.32	0.12	0.06	0.08	0.04	0	0.04	PAL	PREDICTED: phenylalanine ammonia-lyase-like [Juglans regia]	Metabolism;Metabolism;Metabolism;Metabolism	Global and overview maps;Global and overview maps;Biosynthesis of other secondary metabolites;Amino acid metabolism	ko01100//Metabolic pathways;ko01110//Biosynthesis of secondary metabolites;ko00940//Phenylpropanoid biosynthesis;ko00360//Phenylalanine metabolism	K10775;K10775;K10775;K10775	-	-	-
CIL0945S0099	y	66.95	1.01	8.29	0.12	0.03	0.03	1.6	1.86	1.81	0.1	0.2	0	2.03	3.5	1.55	0.09	0	0.06	29.4	29.12	27.97	0.35	0.18	0.14	0.09	0.15	0.01	0.14	0	0.04	PAL	PREDICTED: phenylalanine ammonia-lyase-like [Juglans regia]	Metabolism;Metabolism;Metabolism;Metabolism	Global and overview maps;Global and overview maps;Biosynthesis of other secondary metabolites;Amino acid metabolism	ko01100//Metabolic pathways;ko01110//Biosynthesis of secondary metabolites;ko00940//Phenylpropanoid biosynthesis;ko00360//Phenylalanine metabolism	K10775;K10775;K10775;K10775	-	-	-
CIL0846S0001	n	3.5	5.84	3.84	2.13	2.13	2.38	1.09	1.04	1.19	0.21	0.06	0.35	2.18	0.25	0.88	4.18	3.77	2.51	1.21	1.97	1.78	4.36	5.08	3.84	1.95	2.66	0.98	0.29	0.22	0	PAL	PREDICTED: phenylalanine ammonia-lyase-like [Juglans regia]	Metabolism;Metabolism;Metabolism;Metabolism	Global and overview maps;Global and overview maps;Biosynthesis of other secondary metabolites;Amino acid metabolism	ko01100//Metabolic pathways;ko01110//Biosynthesis of secondary metabolites;ko00940//Phenylpropanoid biosynthesis;ko00360//Phenylalanine metabolism	K10775;K10775;K10775;K10775	-	-	-
CIL1249S0006	n	3.08	5.17	4.83	2.65	2.85	2.86	0.91	1.32	0.9	0.42	0.18	0.42	0.95	0.24	0.5	4.6	5.39	4.08	1.21	1	1.39	3.49	3.79	3.12	1.95	1.45	1.51	0.12	0.15	0.11	PAL	PREDICTED: phenylalanine ammonia-lyase-like [Juglans regia]	Metabolism;Metabolism;Metabolism;Metabolism	Global and overview maps;Global and overview maps;Biosynthesis of other secondary metabolites;Amino acid metabolism	ko01100//Metabolic pathways;ko01110//Biosynthesis of secondary metabolites;ko00940//Phenylpropanoid biosynthesis;ko00360//Phenylalanine metabolism	K10775;K10775;K10775;K10775	GO:0044424//intracellular part	GO:0016841//ammonia-lyase activity	GO:0006558//L-phenylalanine metabolic process;GO:0009699//phenylpropanoid biosynthetic process
CIL1249S0007	n	0	0	0	0	0	0	0	0	0	0	0	0	0	0	0	0	0	0	0	0	0	0	0	0	0	0	0	0	0	0	PAL	PREDICTED: phenylalanine ammonia-lyase-like [Juglans regia]	Metabolism;Metabolism;Metabolism;Metabolism	Global and overview maps;Global and overview maps;Biosynthesis of other secondary metabolites;Amino acid metabolism	ko01100//Metabolic pathways;ko01110//Biosynthesis of secondary metabolites;ko00940//Phenylpropanoid biosynthesis;ko00360//Phenylalanine metabolism	K10775;K10775;K10775;K10775	-	-	-
CIL1203S0005	n	0.98	2.37	0.96	0	0	0	1.18	1.25	1.42	0.03	0.9	0	5.82	3.57	2.3	0	0	0.18	3.68	2.45	2.45	0.25	0	0	0	0	0	0	0	0	PAL	PREDICTED: phenylalanine ammonia-lyase-like [Juglans regia]	Metabolism;Metabolism;Metabolism;Metabolism	Global and overview maps;Global and overview maps;Biosynthesis of other secondary metabolites;Amino acid metabolism	ko01100//Metabolic pathways;ko01110//Biosynthesis of secondary metabolites;ko00940//Phenylpropanoid biosynthesis;ko00360//Phenylalanine metabolism	K10775;K10775;K10775;K10775	-	-	-
CIL1348S0047	y	193.77	82.85	93.35	92.89	143.57	85.64	15.62	15.43	15.32	6	11.21	9.25	74.44	56.38	62.75	117	110.6	101.24	98.64	119.41	114.42	28.61	28.07	26.75	20.96	14.77	11.16	3.83	4.87	3.03	PAL	PREDICTED: phenylalanine ammonia-lyase [Juglans regia]	Metabolism;Metabolism;Metabolism;Metabolism	Global and overview maps;Global and overview maps;Biosynthesis of other secondary metabolites;Amino acid metabolism	ko01100//Metabolic pathways;ko01110//Biosynthesis of secondary metabolites;ko00940//Phenylpropanoid biosynthesis;ko00360//Phenylalanine metabolism	K10775;K10775;K10775;K10775	GO:0044424//intracellular part	GO:0016841//ammonia-lyase activity	GO:0006558//L-phenylalanine metabolic process;GO:0009699//phenylpropanoid biosynthetic process
CIL1196S0046	y	83.77	27.94	31.81	10.16	10.55	10.06	19.06	18.33	18.71	3.84	6.13	4.55	57.14	29.28	31.43	51.27	52.01	41.97	80.9	87	86.4	6.61	6.27	6.71	6.67	5.11	6.6	1.12	1.01	0.81	PAL	PREDICTED: phenylalanine ammonia-lyase [Juglans regia]	Metabolism;Metabolism;Metabolism;Metabolism	Global and overview maps;Global and overview maps;Biosynthesis of other secondary metabolites;Amino acid metabolism	ko01100//Metabolic pathways;ko01110//Biosynthesis of secondary metabolites;ko00940//Phenylpropanoid biosynthesis;ko00360//Phenylalanine metabolism	K10775;K10775;K10775;K10775	GO:0044424//intracellular part	GO:0016841//ammonia-lyase activity	GO:0006558//L-phenylalanine metabolic process;GO:0009699//phenylpropanoid biosynthetic process
CIL1151S0022	y	77.4	62.67	63.69	18.41	17.6	22.25	13.85	14.66	16.12	9.35	23.16	12.87	187.25	95.17	97.11	67.78	64.2	61.41	47.22	39.34	42.77	26.01	27.37	27.51	30.05	28.06	23.4	40.41	36.39	39.47	C4H	PREDICTED: trans-cinnamate 4-monooxygenase [Juglans regia]	Metabolism;Metabolism;Metabolism;Metabolism;Metabolism;Metabolism;Metabolism	Global and overview maps;Global and overview maps;Biosynthesis of other secondary metabolites;Biosynthesis of other secondary metabolites;Amino acid metabolism;Biosynthesis of other secondary metabolites;Metabolism of cofactors and vitamins	ko01100//Metabolic pathways;ko01110//Biosynthesis of secondary metabolites;ko00940//Phenylpropanoid biosynthesis;ko00941//Flavonoid biosynthesis;ko00360//Phenylalanine metabolism;ko00945//Stilbenoid, diarylheptanoid and gingerol biosynthesis;ko00130//Ubiquinone and other terpenoid-quinone biosynthesis	K00487;K00487;K00487;K00487;K00487;K00487;K00487	-	GO:0016709//oxidoreductase activity, acting on paired donors, with incorporation or reduction of molecular oxygen, NAD(P)H as one donor, and incorporation of one atom of oxygen;GO:0046906//tetrapyrrole binding;GO:0046914//transition metal ion binding	GO:0044710//single-organism metabolic process
CIL1151S0021	y	89.32	74.61	65.69	14.18	12.33	13.94	22.71	19.62	20.79	10.62	20.51	10.73	124.64	82.38	91.57	75.6	83.62	70.18	54.49	59.8	54.05	28.56	29.86	30.15	31.82	27.83	20.03	46.63	41.63	47.13	C4H	PREDICTED: trans-cinnamate 4-monooxygenase [Juglans regia]	Metabolism;Metabolism;Metabolism;Metabolism;Metabolism;Metabolism;Metabolism	Global and overview maps;Global and overview maps;Biosynthesis of other secondary metabolites;Biosynthesis of other secondary metabolites;Amino acid metabolism;Biosynthesis of other secondary metabolites;Metabolism of cofactors and vitamins	ko01100//Metabolic pathways;ko01110//Biosynthesis of secondary metabolites;ko00940//Phenylpropanoid biosynthesis;ko00941//Flavonoid biosynthesis;ko00360//Phenylalanine metabolism;ko00945//Stilbenoid, diarylheptanoid and gingerol biosynthesis;ko00130//Ubiquinone and other terpenoid-quinone biosynthesis	K00487;K00487;K00487;K00487;K00487;K00487;K00487	-	GO:0016491//oxidoreductase activity;GO:0046906//tetrapyrrole binding;GO:0046914//transition metal ion binding	GO:0044710//single-organism metabolic process
CIL1312S0012	n	3.52	4.05	3.47	0.42	0.27	0.53	0.05	0.04	0.04	0	0	0	0.15	0.09	0	3.19	4.1	3.14	0.08	0.04	0	0	0	0.03	0	0.06	0	0	0	0	C4H	PREDICTED: trans-cinnamate 4-monooxygenase-like [Juglans regia]	Metabolism;Metabolism;Metabolism;Metabolism;Metabolism;Metabolism;Metabolism	Global and overview maps;Global and overview maps;Biosynthesis of other secondary metabolites;Biosynthesis of other secondary metabolites;Amino acid metabolism;Biosynthesis of other secondary metabolites;Metabolism of cofactors and vitamins	ko01100//Metabolic pathways;ko01110//Biosynthesis of secondary metabolites;ko00940//Phenylpropanoid biosynthesis;ko00941//Flavonoid biosynthesis;ko00360//Phenylalanine metabolism;ko00945//Stilbenoid, diarylheptanoid and gingerol biosynthesis;ko00130//Ubiquinone and other terpenoid-quinone biosynthesis	K00487;K00487;K00487;K00487;K00487;K00487;K00487	-	-	-
CIL1071S0038	y	12.53	8.7	8.6	22.06	31.16	17.85	4.24	4.64	4.2	1.23	1.85	1.31	40.7	13.65	16.05	14.62	14.35	14.44	119.69	122.31	125.77	1.89	2.61	2.29	1.76	2.28	1.32	0.94	1.24	0.26	C4H	PREDICTED: trans-cinnamate 4-monooxygenase-like [Juglans regia]	Metabolism;Metabolism;Metabolism;Metabolism;Metabolism;Metabolism;Metabolism	Global and overview maps;Global and overview maps;Biosynthesis of other secondary metabolites;Biosynthesis of other secondary metabolites;Amino acid metabolism;Biosynthesis of other secondary metabolites;Metabolism of cofactors and vitamins	ko01100//Metabolic pathways;ko01110//Biosynthesis of secondary metabolites;ko00940//Phenylpropanoid biosynthesis;ko00941//Flavonoid biosynthesis;ko00360//Phenylalanine metabolism;ko00945//Stilbenoid, diarylheptanoid and gingerol biosynthesis;ko00130//Ubiquinone and other terpenoid-quinone biosynthesis	K00487;K00487;K00487;K00487;K00487;K00487;K00487	-	-	-
CIL0320S0016	y	185.39	43.37	59.18	28.24	28.23	20.74	21.12	22.47	23.15	4.12	17.17	4.92	293.37	52.16	62.93	46.32	47.21	39.05	232.14	224.71	223.62	16.38	17.66	15.53	11.59	9.44	8.09	5.99	4.21	4.34	C4H	PREDICTED: trans-cinnamate 4-monooxygenase-like isoform X1 [Juglans regia]	Metabolism;Metabolism;Metabolism;Metabolism;Metabolism;Metabolism;Metabolism	Global and overview maps;Global and overview maps;Biosynthesis of other secondary metabolites;Biosynthesis of other secondary metabolites;Amino acid metabolism;Biosynthesis of other secondary metabolites;Metabolism of cofactors and vitamins	ko01100//Metabolic pathways;ko01110//Biosynthesis of secondary metabolites;ko00940//Phenylpropanoid biosynthesis;ko00941//Flavonoid biosynthesis;ko00360//Phenylalanine metabolism;ko00945//Stilbenoid, diarylheptanoid and gingerol biosynthesis;ko00130//Ubiquinone and other terpenoid-quinone biosynthesis	K00487;K00487;K00487;K00487;K00487;K00487;K00487	-	GO:0016709//oxidoreductase activity, acting on paired donors, with incorporation or reduction of molecular oxygen, NAD(P)H as one donor, and incorporation of one atom of oxygen;GO:0046906//tetrapyrrole binding;GO:0046914//transition metal ion binding	GO:0044710//single-organism metabolic process
CIL0992S0076	y	40.27	5.98	10.01	1.67	1.91	1.47	2.43	2.46	2.61	0.04	2.52	0.23	12.71	6.17	6.62	4.91	5.01	4.7	39.69	41.34	40.67	1.07	0.95	0.5	0.77	0.49	0.54	0.08	0.13	0.05	4CL	PREDICTED: 4-coumarate--CoA ligase 1-like [Juglans regia]	Metabolism;Metabolism;Metabolism;Metabolism;Metabolism	Global and overview maps;Global and overview maps;Biosynthesis of other secondary metabolites;Amino acid metabolism;Metabolism of cofactors and vitamins	ko01100//Metabolic pathways;ko01110//Biosynthesis of secondary metabolites;ko00940//Phenylpropanoid biosynthesis;ko00360//Phenylalanine metabolism;ko00130//Ubiquinone and other terpenoid-quinone biosynthesis	K01904;K01904;K01904;K01904;K01904	-	GO:0016405//CoA-ligase activity	-
CIL1445S0010	n	2.3	2.85	3.04	1.5	0.81	1.33	0.8	0.98	1.1	0	0.05	0.06	0.56	0	0.3	3.71	4.85	3.9	1.47	1.65	2.09	0.56	0.4	0.5	0.18	0.24	0.23	0	0.03	0.06	4CL	PREDICTED: 4-coumarate--CoA ligase 1-like [Juglans regia]	Metabolism;Metabolism;Metabolism;Metabolism;Metabolism	Global and overview maps;Global and overview maps;Biosynthesis of other secondary metabolites;Amino acid metabolism;Metabolism of cofactors and vitamins	ko01100//Metabolic pathways;ko01110//Biosynthesis of secondary metabolites;ko00940//Phenylpropanoid biosynthesis;ko00360//Phenylalanine metabolism;ko00130//Ubiquinone and other terpenoid-quinone biosynthesis	K01904;K01904;K01904;K01904;K01904	-	GO:0016405//CoA-ligase activity	-
CIL1158S0044	n	3.59	5.11	4.41	1.35	0.45	1.47	0.49	0.29	0.33	1.36	1.43	1.3	1.64	2.35	1.77	2.43	2.85	2.62	0.22	0.19	0.21	0.9	0.72	0.83	0.23	0.1	0.14	0.04	0.03	0.04	4CL	PREDICTED: 4-coumarate--CoA ligase 2-like isoform X2 [Juglans regia]	Metabolism;Metabolism;Metabolism;Metabolism;Metabolism	Global and overview maps;Global and overview maps;Biosynthesis of other secondary metabolites;Amino acid metabolism;Metabolism of cofactors and vitamins	ko01100//Metabolic pathways;ko01110//Biosynthesis of secondary metabolites;ko00940//Phenylpropanoid biosynthesis;ko00360//Phenylalanine metabolism;ko00130//Ubiquinone and other terpenoid-quinone biosynthesis	K01904;K01904;K01904;K01904;K01904	-	GO:0016703//oxidoreductase activity, acting on single donors with incorporation of molecular oxygen, incorporation of one atom of oxygen (internal monooxygenases or internal mixed function oxidases)	GO:0044710//single-organism metabolic process
MSTRG.31342	y	159.94	13.44	28.73	8.53	10.52	7.23	7.74	8.57	9.46	0.67	3.85	0.95	79.72	34.21	24.38	8.27	10.1	9.16	109.64	108.94	109.84	1.7	1.54	1.31	1.65	1.52	0.81	1.09	1	0.91	4CL	PREDICTED: 4-coumarate--CoA ligase 2-like [Juglans regia]	Metabolism;Metabolism;Metabolism;Metabolism;Metabolism	Global and overview maps;Global and overview maps;Biosynthesis of other secondary metabolites;Amino acid metabolism;Metabolism of cofactors and vitamins	ko01100//Metabolic pathways;ko01110//Biosynthesis of secondary metabolites;ko00940//Phenylpropanoid biosynthesis;ko00360//Phenylalanine metabolism;ko00130//Ubiquinone and other terpenoid-quinone biosynthesis	K01904;K01904;K01904;K01904;K01904	-	GO:0016703//oxidoreductase activity, acting on single donors with incorporation of molecular oxygen, incorporation of one atom of oxygen (internal monooxygenases or internal mixed function oxidases)	GO:0044710//single-organism metabolic process
CIL1192S0044	y	14.57	10.28	9.92	3.41	1.6	3.3	2.09	1.92	2.14	1.68	3.09	2.79	8.6	8.78	9.2	15.77	13.82	11.24	1.01	1.43	1.03	5.81	5.88	5.61	2.77	2.46	2.52	2.83	3.8	3.6	4CL	PREDICTED: 4-coumarate--CoA ligase 2-like [Juglans regia]	Metabolism;Metabolism;Metabolism;Metabolism;Metabolism	Global and overview maps;Global and overview maps;Biosynthesis of other secondary metabolites;Amino acid metabolism;Metabolism of cofactors and vitamins	ko01100//Metabolic pathways;ko01110//Biosynthesis of secondary metabolites;ko00940//Phenylpropanoid biosynthesis;ko00360//Phenylalanine metabolism;ko00130//Ubiquinone and other terpenoid-quinone biosynthesis	K01904;K01904;K01904;K01904;K01904	-	GO:0016405//CoA-ligase activity;GO:0016703//oxidoreductase activity, acting on single donors with incorporation of molecular oxygen, incorporation of one atom of oxygen (internal monooxygenases or internal mixed function oxidases);GO:0032550//purine ribonucleoside binding	GO:0006725//cellular aromatic compound metabolic process;GO:0009411//response to UV;GO:0009813//flavonoid biosynthetic process;GO:0010208//pollen wall assembly;GO:0034285//response to disaccharide;GO:0044710//single-organism metabolic process
CIL1138S0013	n	2.24	5.56	4.99	0.89	0.75	1.13	0.7	0.99	0.6	0.28	0.21	0.34	0.44	0.46	0.25	2.46	2.61	2.36	1.25	1.63	1.9	0.55	1.08	0.66	0.2	0.08	0.06	0.13	0	0.08	4CL	PREDICTED: 4-coumarate--CoA ligase-like 1 [Juglans regia]	Metabolism;Metabolism;Metabolism;Metabolism;Metabolism	Global and overview maps;Global and overview maps;Biosynthesis of other secondary metabolites;Amino acid metabolism;Metabolism of cofactors and vitamins	ko01100//Metabolic pathways;ko01110//Biosynthesis of secondary metabolites;ko00940//Phenylpropanoid biosynthesis;ko00360//Phenylalanine metabolism;ko00130//Ubiquinone and other terpenoid-quinone biosynthesis	K01904;K01904;K01904;K01904;K01904	GO:0044424//intracellular part	GO:0015645//fatty acid ligase activity;GO:0032550//purine ribonucleoside binding	GO:0006631//fatty acid metabolic process;GO:0010208//pollen wall assembly;GO:0019438//aromatic compound biosynthetic process;GO:0035337//fatty-acyl-CoA metabolic process
CIL1486S0025	n	0	0	0	0	0	0	0	0	0	0	0	0	0	0	0	0	0	0	0	0	0	0	0	0	0	0	0	0	0	0	4CL	PREDICTED: 4-coumarate--CoA ligase-like 1 [Juglans regia]	Metabolism;Metabolism;Metabolism;Metabolism;Metabolism	Global and overview maps;Global and overview maps;Biosynthesis of other secondary metabolites;Amino acid metabolism;Metabolism of cofactors and vitamins	ko01100//Metabolic pathways;ko01110//Biosynthesis of secondary metabolites;ko00940//Phenylpropanoid biosynthesis;ko00360//Phenylalanine metabolism;ko00130//Ubiquinone and other terpenoid-quinone biosynthesis	K01904;K01904;K01904;K01904;K01904	-	GO:0015645//fatty acid ligase activity	GO:0010208//pollen wall assembly;GO:0044249//cellular biosynthetic process;GO:0071704//organic substance metabolic process
CIL0902S0009	n	1.22	1.24	1.15	0.54	0.3	0.62	2.41	2.61	2.56	2.55	1.74	2.68	1.18	1.17	2.01	0.63	0.39	0.4	1.01	0.91	0.78	1.27	0.97	1.43	1.72	2.77	2.88	2.74	5.15	3.51	4CL	PREDICTED: 4-coumarate--CoA ligase-like 6 isoform X1 [Juglans regia]	Metabolism;Metabolism;Metabolism;Metabolism;Metabolism	Global and overview maps;Global and overview maps;Biosynthesis of other secondary metabolites;Amino acid metabolism;Metabolism of cofactors and vitamins	ko01100//Metabolic pathways;ko01110//Biosynthesis of secondary metabolites;ko00940//Phenylpropanoid biosynthesis;ko00360//Phenylalanine metabolism;ko00130//Ubiquinone and other terpenoid-quinone biosynthesis	K01904;K01904;K01904;K01904;K01904	GO:0042579//microbody	GO:0003824//catalytic activity;GO:0032550//purine ribonucleoside binding	GO:0009608//response to symbiont;GO:0044248//cellular catabolic process
CIL0492S0001	y	21.42	30.41	27.37	13.51	17.72	13.72	10.24	10.26	9.08	4.76	4.13	7.01	3.15	3.37	3.16	12.33	12.05	12.17	6.71	7.51	7.49	9.41	9.31	10.22	6.26	5.71	4.93	4.29	4.82	5.38	4CL	PREDICTED: 4-coumarate--CoA ligase-like 7, partial [Juglans regia]	Metabolism;Metabolism;Metabolism;Metabolism;Metabolism	Global and overview maps;Global and overview maps;Biosynthesis of other secondary metabolites;Amino acid metabolism;Metabolism of cofactors and vitamins	ko01100//Metabolic pathways;ko01110//Biosynthesis of secondary metabolites;ko00940//Phenylpropanoid biosynthesis;ko00360//Phenylalanine metabolism;ko00130//Ubiquinone and other terpenoid-quinone biosynthesis	K01904;K01904;K01904;K01904;K01904	-	GO:0016703//oxidoreductase activity, acting on single donors with incorporation of molecular oxygen, incorporation of one atom of oxygen (internal monooxygenases or internal mixed function oxidases)	GO:0044710//single-organism metabolic process
CIL0937S0156	y	9.59	10.44	10.11	14.93	14.97	13.16	25.66	24.38	26.06	19.77	26.83	23.4	20.44	24.58	19.23	12.56	11.2	13.02	16.88	18.92	16.88	33.56	34.27	32.78	27.48	23.76	22.91	11.56	9.56	10.22	4CL	PREDICTED: 4-coumarate--CoA ligase-like 7 [Juglans regia]	Metabolism;Metabolism;Metabolism;Metabolism;Metabolism	Global and overview maps;Global and overview maps;Biosynthesis of other secondary metabolites;Amino acid metabolism;Metabolism of cofactors and vitamins	ko01100//Metabolic pathways;ko01110//Biosynthesis of secondary metabolites;ko00940//Phenylpropanoid biosynthesis;ko00360//Phenylalanine metabolism;ko00130//Ubiquinone and other terpenoid-quinone biosynthesis	K01904;K01904;K01904;K01904;K01904	GO:0042579//microbody	GO:0016408//C-acyltransferase activity;GO:0016703//oxidoreductase activity, acting on single donors with incorporation of molecular oxygen, incorporation of one atom of oxygen (internal monooxygenases or internal mixed function oxidases);GO:0032550//purine ribonucleoside binding	GO:0006633//fatty acid biosynthetic process;GO:0009694//jasmonic acid metabolic process
CIL1051S0057	y	24.4	5.9	10.14	0.73	0.39	0.51	6.22	6.32	5.92	0.94	0.62	0.46	9.76	9.71	9.4	2.66	2.43	2.2	18.97	18.24	19.87	1.38	1.13	1.07	1.41	1.71	2.2	12.63	13.72	10.08	4CL	PREDICTED: 4-coumarate--CoA ligase-like 7 isoform X1 [Juglans regia]	Metabolism;Metabolism;Metabolism;Metabolism;Metabolism	Global and overview maps;Global and overview maps;Biosynthesis of other secondary metabolites;Amino acid metabolism;Metabolism of cofactors and vitamins	ko01100//Metabolic pathways;ko01110//Biosynthesis of secondary metabolites;ko00940//Phenylpropanoid biosynthesis;ko00360//Phenylalanine metabolism;ko00130//Ubiquinone and other terpenoid-quinone biosynthesis	K01904;K01904;K01904;K01904;K01904	GO:0042579//microbody	GO:0016408//C-acyltransferase activity;GO:0016703//oxidoreductase activity, acting on single donors with incorporation of molecular oxygen, incorporation of one atom of oxygen (internal monooxygenases or internal mixed function oxidases);GO:0032550//purine ribonucleoside binding	GO:0006633//fatty acid biosynthetic process;GO:0009694//jasmonic acid metabolic process
CIL1105S0008	n	5.51	8.44	7.08	7.89	5.09	7.55	6.24	6.33	5.7	3.2	2.85	3.38	2.31	2.63	2.34	12.03	11.4	12.54	5.67	6.85	6.43	8.64	8.92	9.63	5.76	5.62	4.95	1.39	1.58	2.46	4CL	PREDICTED: 4-coumarate--CoA ligase-like 7, partial [Juglans regia]	Metabolism;Metabolism;Metabolism;Metabolism;Metabolism	Global and overview maps;Global and overview maps;Biosynthesis of other secondary metabolites;Amino acid metabolism;Metabolism of cofactors and vitamins	ko01100//Metabolic pathways;ko01110//Biosynthesis of secondary metabolites;ko00940//Phenylpropanoid biosynthesis;ko00360//Phenylalanine metabolism;ko00130//Ubiquinone and other terpenoid-quinone biosynthesis	K01904;K01904;K01904;K01904;K01904	-	GO:0016703//oxidoreductase activity, acting on single donors with incorporation of molecular oxygen, incorporation of one atom of oxygen (internal monooxygenases or internal mixed function oxidases)	GO:0044710//single-organism metabolic process
CIL0006S0011	y	309.85	2.41	24.28	1.15	0.85	0.51	14.48	14.27	15.34	0.62	4.69	0.47	112.44	28.35	30.65	0.22	0.51	0.84	289.2	284.81	289.52	0.78	0.61	0.72	0.51	0.54	0.59	0.67	0.46	0.34	CHS	PREDICTED: chalcone synthase-like [Juglans regia]	Metabolism;Metabolism;Metabolism;Organismal Systems	Global and overview maps;Global and overview maps;Biosynthesis of other secondary metabolites;Environmental adaptation	ko01100//Metabolic pathways;ko01110//Biosynthesis of secondary metabolites;ko00941//Flavonoid biosynthesis;ko04712//Circadian rhythm - plant	K00660;K00660;K00660;K00660	GO:0005774//vacuolar membrane	GO:0016747//transferase activity, transferring acyl groups other than amino-acyl groups	GO:0009411//response to UV;GO:0009813//flavonoid biosynthetic process;GO:0034285//response to disaccharide;GO:0060918//auxin transport
CIL0118S0028	n	0	0	0	0	0	0	0	0	0	0	0	0	0	0	0	0	0	0	0	0	0	0	0	0	0	0	0	0	0	0	CHS	PREDICTED: chalcone synthase-like [Juglans regia]	Metabolism;Metabolism;Metabolism;Organismal Systems	Global and overview maps;Global and overview maps;Biosynthesis of other secondary metabolites;Environmental adaptation	ko01100//Metabolic pathways;ko01110//Biosynthesis of secondary metabolites;ko00941//Flavonoid biosynthesis;ko04712//Circadian rhythm - plant	K00660;K00660;K00660;K00660	-	-	-
CIL0354S0001	n	0.15	0.08	0.11	0.14	0.09	0.27	0	0.05	0.14	0.09	0.04	0	0	0.14	0	0.06	0.07	0.06	0	0.09	0	0.06	0	0.25	0	0	0.13	0	0	0.13	CHS	PREDICTED: chalcone synthase-like [Juglans regia]	Metabolism;Metabolism;Metabolism;Organismal Systems	Global and overview maps;Global and overview maps;Biosynthesis of other secondary metabolites;Environmental adaptation	ko01100//Metabolic pathways;ko01110//Biosynthesis of secondary metabolites;ko00941//Flavonoid biosynthesis;ko04712//Circadian rhythm - plant	K00660;K00660;K00660;K00660	GO:0005774//vacuolar membrane	GO:0016747//transferase activity, transferring acyl groups other than amino-acyl groups	GO:0009411//response to UV;GO:0009813//flavonoid biosynthetic process;GO:0034285//response to disaccharide;GO:0060918//auxin transport
CIL0832S0001	n	0	0	0	0	0	0	0	0	0	0	0	0	0	0	0	0	0	0	0	0	0	0	0	0	0	0	0	0	0	0	CHS	PREDICTED: chalcone synthase-like [Juglans regia]	Metabolism;Metabolism;Metabolism;Organismal Systems	Global and overview maps;Global and overview maps;Biosynthesis of other secondary metabolites;Environmental adaptation	ko01100//Metabolic pathways;ko01110//Biosynthesis of secondary metabolites;ko00941//Flavonoid biosynthesis;ko04712//Circadian rhythm - plant	K00660;K00660;K00660;K00660	GO:0005774//vacuolar membrane	GO:0016747//transferase activity, transferring acyl groups other than amino-acyl groups	GO:0009411//response to UV;GO:0009813//flavonoid biosynthetic process;GO:0034285//response to disaccharide;GO:0060918//auxin transport
CIL1297S0005	n	0	0	0	0	0	0	0	0	0	0	0	0	0	0	0	0	0	0	0	0	0	0	0	0	0	0	0	0	0	0	CHS	PREDICTED: chalcone synthase-like [Juglans regia]	Metabolism;Metabolism;Metabolism;Organismal Systems	Global and overview maps;Global and overview maps;Biosynthesis of other secondary metabolites;Environmental adaptation	ko01100//Metabolic pathways;ko01110//Biosynthesis of secondary metabolites;ko00941//Flavonoid biosynthesis;ko04712//Circadian rhythm - plant	K00660;K00660;K00660;K00660	-	GO:0016747//transferase activity, transferring acyl groups other than amino-acyl groups	GO:0009812//flavonoid metabolic process
CIL1297S0007	n	0	0	0	0	0	0	0	0	0	0	0	0	0	0	0	0	0	0	0	0	0	0	0	0	0	0	0	0	0	0	CHS	PREDICTED: chalcone synthase-like [Juglans regia]	Metabolism;Metabolism;Metabolism;Organismal Systems	Global and overview maps;Global and overview maps;Biosynthesis of other secondary metabolites;Environmental adaptation	ko01100//Metabolic pathways;ko01110//Biosynthesis of secondary metabolites;ko00941//Flavonoid biosynthesis;ko04712//Circadian rhythm - plant	K00660;K00660;K00660;K00660	-	-	-
CIL1297S0008	n	0	0	0	0	0	0	0	0	0	0	0	0	0	0	0	0	0	0	0	0	0	0	0	0	0	0	0	0	0	0	CHS	PREDICTED: chalcone synthase-like [Juglans regia]	Metabolism;Metabolism;Metabolism;Organismal Systems	Global and overview maps;Global and overview maps;Biosynthesis of other secondary metabolites;Environmental adaptation	ko01100//Metabolic pathways;ko01110//Biosynthesis of secondary metabolites;ko00941//Flavonoid biosynthesis;ko04712//Circadian rhythm - plant	K00660;K00660;K00660;K00660	-	GO:0016747//transferase activity, transferring acyl groups other than amino-acyl groups	GO:0009812//flavonoid metabolic process
CIL0047S0003	n	0.34	0.18	0	0	0	0.17	0.14	0	0	0	0	0	0	0	0	0	0	0.14	0	0	0	0	0	0	0	0	0	0	0	0	CHS	PREDICTED: chalcone synthase 6-4-like [Juglans regia]	Metabolism;Metabolism;Metabolism;Organismal Systems	Global and overview maps;Global and overview maps;Biosynthesis of other secondary metabolites;Environmental adaptation	ko01100//Metabolic pathways;ko01110//Biosynthesis of secondary metabolites;ko00941//Flavonoid biosynthesis;ko04712//Circadian rhythm - plant	K00660;K00660;K00660;K00660	-	-	-
CIL1095S0013	n	0	0	0	0	0	0	0	0	0	0	0	0	0	0	0	0	0	0	0	0	0	0	0	0	0	0	0	0	0	0	CHS	PREDICTED: chalcone synthase-like [Juglans regia]	Metabolism;Metabolism;Metabolism;Organismal Systems	Global and overview maps;Global and overview maps;Biosynthesis of other secondary metabolites;Environmental adaptation	ko01100//Metabolic pathways;ko01110//Biosynthesis of secondary metabolites;ko00941//Flavonoid biosynthesis;ko04712//Circadian rhythm - plant	K00660;K00660;K00660;K00660	-	-	-
CIL1380S0021	y	16.98	10.99	12.55	3.98	1.4	3.89	3.42	3.1	3.32	1.64	3.69	4.65	4.85	8.65	6.52	9.29	10.33	10.67	0.98	1.08	0.68	1.76	1.68	2.28	2.62	1.38	1.4	0.76	1.09	0.6	CHS	PREDICTED: chalcone synthase 2 [Juglans regia]	Metabolism;Metabolism;Metabolism;Organismal Systems	Global and overview maps;Global and overview maps;Biosynthesis of other secondary metabolites;Environmental adaptation	ko01100//Metabolic pathways;ko01110//Biosynthesis of secondary metabolites;ko00941//Flavonoid biosynthesis;ko04712//Circadian rhythm - plant	K00660;K00660;K00660;K00660	GO:0005774//vacuolar membrane	GO:0016747//transferase activity, transferring acyl groups other than amino-acyl groups	GO:0009411//response to UV;GO:0009813//flavonoid biosynthetic process;GO:0034285//response to disaccharide;GO:0060918//auxin transport
CIL1399S0001	y	224.35	141.27	160.35	52.1	21.83	44.5	45.8	39.17	42.79	27.72	52.34	38.82	142.93	136.94	138.74	280.6	264.9	224.36	37.49	41.84	39.84	131.35	131.39	127.63	87.76	57.41	63.61	37.03	27.98	22.14	CHS	PREDICTED: chalcone synthase 1-like [Juglans regia]	Metabolism;Metabolism;Metabolism;Organismal Systems	Global and overview maps;Global and overview maps;Biosynthesis of other secondary metabolites;Environmental adaptation	ko01100//Metabolic pathways;ko01110//Biosynthesis of secondary metabolites;ko00941//Flavonoid biosynthesis;ko04712//Circadian rhythm - plant	K00660;K00660;K00660;K00660	-	GO:0016747//transferase activity, transferring acyl groups other than amino-acyl groups	GO:0008152//metabolic process
CIL1549S0032	y	206.94	173.39	173.93	44.93	14.56	41.02	30.72	27.41	29.37	9.15	31.57	20.54	140.88	102.99	132.14	280.95	268.85	230.31	30.91	30.84	30.71	87.24	86.64	84.19	51.93	28.93	36.21	29.48	28.63	18.59	CHS	PREDICTED: chalcone synthase 1 [Juglans regia]	Metabolism;Metabolism;Metabolism;Organismal Systems	Global and overview maps;Global and overview maps;Biosynthesis of other secondary metabolites;Environmental adaptation	ko01100//Metabolic pathways;ko01110//Biosynthesis of secondary metabolites;ko00941//Flavonoid biosynthesis;ko04712//Circadian rhythm - plant	K00660;K00660;K00660;K00660	-	GO:0016746//transferase activity, transferring acyl groups	GO:0008152//metabolic process
CIL0047S0004	n	0	0	0	0	0	0	0	0	0	0	0	0	0	0	0	0	0	0	0	0	0	0	0	0	0	0	0	0	0	0	CHS	PREDICTED: chalcone synthase [Ricinus communis]	Metabolism;Metabolism;Metabolism;Organismal Systems	Global and overview maps;Global and overview maps;Biosynthesis of other secondary metabolites;Environmental adaptation	ko01100//Metabolic pathways;ko01110//Biosynthesis of secondary metabolites;ko00941//Flavonoid biosynthesis;ko04712//Circadian rhythm - plant	K00660;K00660;K00660;K00660	-	GO:0016746//transferase activity, transferring acyl groups	-
CIL1294S0014	n	0	0	0	0	0	0	0	0	0	0	0	0	0	0	0	0	0	0	0	0	0	0	0	0	0	0	0	0	0	0	CHS	PREDICTED: chalcone synthase-like [Juglans regia]	Metabolism;Metabolism;Metabolism;Organismal Systems	Global and overview maps;Global and overview maps;Biosynthesis of other secondary metabolites;Environmental adaptation	ko01100//Metabolic pathways;ko01110//Biosynthesis of secondary metabolites;ko00941//Flavonoid biosynthesis;ko04712//Circadian rhythm - plant	K00660;K00660;K00660;K00660	-	-	-
CIL1297S0006	n	0	0	0	0	0	0	0	0	0	0	0	0	0	0	0	0	0	0	0	0	0	0	0	0	0	0	0	0	0	0	CHS	PREDICTED: chalcone synthase-like [Juglans regia]	Metabolism;Metabolism;Metabolism;Organismal Systems	Global and overview maps;Global and overview maps;Biosynthesis of other secondary metabolites;Environmental adaptation	ko01100//Metabolic pathways;ko01110//Biosynthesis of secondary metabolites;ko00941//Flavonoid biosynthesis;ko04712//Circadian rhythm - plant	K00660;K00660;K00660;K00660	-	-	-
CIL1297S0009	n	0	0	0	0	0	0	0	0	0	0	0	0	0	0	0	0	0	0	0	0	0	0	0	0	0	0	0	0	0	0	CHS	PREDICTED: chalcone synthase 6-4-like [Juglans regia]	Metabolism;Metabolism;Metabolism;Organismal Systems	Global and overview maps;Global and overview maps;Biosynthesis of other secondary metabolites;Environmental adaptation	ko01100//Metabolic pathways;ko01110//Biosynthesis of secondary metabolites;ko00941//Flavonoid biosynthesis;ko04712//Circadian rhythm - plant	K00660;K00660;K00660;K00660	-	-	-
CIL1297S0010	n	0	0	0	0	0	0	0	0	0	0	0	0	0	0	0	0	0	0	0	0	0	0	0	0	0	0	0	0	0	0	CHS	PREDICTED: chalcone synthase-like [Juglans regia]	Metabolism;Metabolism;Metabolism;Organismal Systems	Global and overview maps;Global and overview maps;Biosynthesis of other secondary metabolites;Environmental adaptation	ko01100//Metabolic pathways;ko01110//Biosynthesis of secondary metabolites;ko00941//Flavonoid biosynthesis;ko04712//Circadian rhythm - plant	K00660;K00660;K00660;K00660	-	-	-
CIL1546S0028	y	43.2	37.18	35.91	22.97	21.37	26.71	10.57	13.44	11.4	10.97	23.84	19.53	42.4	34.44	31.15	90.54	76.82	79.75	20.78	17.55	19.13	69.62	71.09	64.1	41.2	30.98	30.48	12.5	11.43	9.8	CHI	PREDICTED: chalcone--flavonone isomerase-like isoform X1 [Juglans regia]	Metabolism;Metabolism;Metabolism	Global and overview maps;Global and overview maps;Biosynthesis of other secondary metabolites	ko01100//Metabolic pathways;ko01110//Biosynthesis of secondary metabolites;ko00941//Flavonoid biosynthesis	K01859;K01859;K01859	-	-	-
CIL0301S0006	y	131.73	102.64	107.5	30.17	15.53	30.29	18.82	17.86	19.58	5.85	15.88	11.53	63.53	54.67	49.03	188.37	154.53	160.66	15.37	17.04	14.73	48.89	47.17	48.9	19.5	13.64	13.56	5.46	5.66	4.32	CHI	PREDICTED: probable chalcone--flavonone isomerase 3 [Juglans regia]	Metabolism;Metabolism;Metabolism	Global and overview maps;Global and overview maps;Biosynthesis of other secondary metabolites	ko01100//Metabolic pathways;ko01110//Biosynthesis of secondary metabolites;ko00941//Flavonoid biosynthesis	K01859;K01859;K01859	-	GO:0016872//intramolecular lyase activity	GO:0009411//response to UV;GO:0009812//flavonoid metabolic process;GO:0034285//response to disaccharide
CIL1020S0081	y	299.01	306.67	301.02	134.26	84.49	150.87	86.8	79.4	82.79	90.56	128.42	108.23	274.32	245.87	287.52	439.34	462.4	369.23	81.81	84.2	78.5	132.38	134.91	133	80.51	61.3	55.58	35.92	30.98	24.66	F3H	PREDICTED: naringenin,2-oxoglutarate 3-dioxygenase [Juglans regia]	Metabolism;Metabolism;Metabolism	Global and overview maps;Global and overview maps;Biosynthesis of other secondary metabolites	ko01100//Metabolic pathways;ko01110//Biosynthesis of secondary metabolites;ko00941//Flavonoid biosynthesis	K00475;K00475;K00475	-	GO:0016706//oxidoreductase activity, acting on paired donors, with incorporation or reduction of molecular oxygen, 2-oxoglutarate as one donor, and incorporation of one atom each of oxygen into both donors;GO:0019842//vitamin binding;GO:0043169//cation binding	GO:0009812//flavonoid metabolic process;GO:0044710//single-organism metabolic process
CIL0909S0093	y	149.28	178.96	173.46	479.12	447.09	402.61	123.61	107.13	116.37	36.69	48.11	46.81	81.58	60.09	67.61	242.97	248.14	235.91	167.77	184.85	177.88	115.31	112.31	110.09	34.54	20.06	26.3	9.3	6.86	6.67	F3′H	PREDICTED: flavonoid 3'-monooxygenase [Juglans regia]	Metabolism;Metabolism;Metabolism;Metabolism	Global and overview maps;Global and overview maps;Biosynthesis of other secondary metabolites;Biosynthesis of other secondary metabolites	ko01100//Metabolic pathways;ko01110//Biosynthesis of secondary metabolites;ko00941//Flavonoid biosynthesis;ko00944//Flavone and flavonol biosynthesis	K05280;K05280;K05280;K05280	GO:0031090//organelle membrane;GO:0031224//intrinsic component of membrane;GO:0043231//intracellular membrane-bounded organelle	GO:0016709//oxidoreductase activity, acting on paired donors, with incorporation or reduction of molecular oxygen, NAD(P)H as one donor, and incorporation of one atom of oxygen;GO:0046906//tetrapyrrole binding;GO:0046914//transition metal ion binding	GO:0009411//response to UV;GO:0009813//flavonoid biosynthetic process;GO:0034285//response to disaccharide;GO:0044710//single-organism metabolic process
CIL0326S0004	n	0	0	0	0.04	0	0	0	0	0	0	0	0	0	0	0	0	0	0	0	0	0	0	0	0	0	0	0	0	0	0	F3′H	PREDICTED: flavonoid 3'-monooxygenase-like [Juglans regia]	Metabolism;Metabolism;Metabolism	Global and overview maps;Global and overview maps;Metabolism of terpenoids and polyketides	ko01100//Metabolic pathways;ko01110//Biosynthesis of secondary metabolites;ko00905//Brassinosteroid biosynthesis	K20623;K20623;K20623	-	GO:0016491//oxidoreductase activity;GO:0046906//tetrapyrrole binding;GO:0046914//transition metal ion binding	GO:0044710//single-organism metabolic process
CIL1173S0069	n	0.17	0.23	0.05	0	0	0.09	0	0	0	0	0	0	0	0	0	0	0.13	0	0	0	0	0	0	0	0	0	0	0.02	0	0	F3′H	PREDICTED: flavonoid 3'-monooxygenase-like [Juglans regia]	Metabolism;Metabolism;Metabolism	Global and overview maps;Global and overview maps;Metabolism of terpenoids and polyketides	ko01100//Metabolic pathways;ko01110//Biosynthesis of secondary metabolites;ko00905//Brassinosteroid biosynthesis	K20623;K20623;K20623	-	GO:0016491//oxidoreductase activity;GO:0046906//tetrapyrrole binding;GO:0046914//transition metal ion binding	GO:0044710//single-organism metabolic process
CIL0213S0013	y	18.99	27.18	20.75	5.45	3.3	5.02	5.07	5.8	5.58	0.44	1	0.76	12.45	2.54	12.86	20.38	21.86	20.26	5.36	5.45	5.74	2.28	2.34	2.05	0.18	0.2	0.32	0.1	0	0.06	F3′5′H	PREDICTED: flavonoid 3',5'-hydroxylase 2-like [Juglans regia]	-	-	-	-	-	GO:0016491//oxidoreductase activity;GO:0046906//tetrapyrrole binding;GO:0046914//transition metal ion binding	GO:0044710//single-organism metabolic process
CIL0335S0002	n	0	0	0	0	0	0	0	0	0	0	0	0	0.04	0	0	0	0	0	0	0	0	0	0	0	0	0	0	0	0	0	F3′5′H	PREDICTED: flavonoid 3',5'-hydroxylase-like, partial [Juglans regia]	Metabolism	Global and overview maps	ko01100//Metabolic pathways	K00512	-	-	-
MSTRG.22083	n	0.06	0	0	0.16	0	0	0.05	0.13	0	0	6.49	0	1.29	1.81	1.22	0	0	0	1.05	0.52	0.73	0.05	0.1	0.18	0	0	0	0	0	0	F3′5′H	PREDICTED: flavonoid 3',5'-hydroxylase-like [Juglans regia]	Metabolism	Global and overview maps	ko01100//Metabolic pathways	K00512	-	-	-
MSTRG.25379	y	4	0	0.15	0	0	0	0.17	0.07	0.19	0	0.85	0.02	5.79	3.79	2.45	0	0.04	0	8.62	6.69	7.42	0	0	0	0	0	0.09	1.85	2.99	0.29	F3′5′H	PREDICTED: flavonoid 3',5'-hydroxylase 1-like [Juglans regia]	Metabolism	Global and overview maps	ko01100//Metabolic pathways	K00512	-	GO:0016705//oxidoreductase activity, acting on paired donors, with incorporation or reduction of molecular oxygen;GO:0046872//metal ion binding	-
MSTRG.27951	y	112.81	0.14	4.68	0.26	0.17	0.1	4.1	4.56	5.51	0.09	14.21	0.27	105.08	56.17	67.15	0.09	0	0.08	106.45	102.49	107.98	0.42	0.57	0.32	0.08	0.21	0.19	0.66	1.45	0.14	F3′5′H	PREDICTED: flavonoid 3',5'-hydroxylase-like [Juglans regia]	Metabolism	Global and overview maps	ko01100//Metabolic pathways	K00512	-	-	-
MSTRG.5782	n	0.57	0.04	0.04	0	0	0	0	0	0	0	0.98	0	3.5	2.31	3.44	0	0	0	0.23	0.54	0.23	0.03	0	0	0	0	0	0	0	0	F3′5′H	PREDICTED: flavonoid 3',5'-hydroxylase-like isoform X1 [Juglans regia]	Metabolism	Global and overview maps	ko01100//Metabolic pathways	K00512	-	GO:0016705//oxidoreductase activity, acting on paired donors, with incorporation or reduction of molecular oxygen;GO:0046872//metal ion binding	-
CIL0203S0006	y	9.14	11.23	10.56	1.06	0.69	1.79	0.43	0.37	0.39	0.4	0.67	0.39	1.19	0.81	2.08	5.92	6.1	5.98	0.17	0.46	0.16	1.16	1	0.96	1.33	1.04	0.65	0.58	0.77	0.61	DFR	PREDICTED: dihydroflavonol-4-reductase-like [Juglans regia]	Metabolism;Metabolism;Metabolism	Global and overview maps;Global and overview maps;Biosynthesis of other secondary metabolites	ko01100//Metabolic pathways;ko01110//Biosynthesis of secondary metabolites;ko00941//Flavonoid biosynthesis	K13082;K13082;K13082	GO:0031312//extrinsic component of organelle membrane	GO:0016616//oxidoreductase activity, acting on the CH-OH group of donors, NAD or NADP as acceptor;GO:0048037//cofactor binding	GO:0009411//response to UV;GO:0009813//flavonoid biosynthetic process;GO:0034285//response to disaccharide;GO:0044710//single-organism metabolic process
CIL0203S0007	y	129.29	102.11	106.14	444.67	539.45	418.89	72.36	66.92	73.75	71.36	113.28	89.77	166.77	131.9	126.32	200.13	189.39	174.1	115.08	107.98	115.38	225.66	225.46	231.43	123.53	97.99	97.42	37.05	27.74	26.5	DFR	PREDICTED: dihydroflavonol-4-reductase-like [Juglans regia]	Metabolism;Metabolism;Metabolism	Global and overview maps;Global and overview maps;Biosynthesis of other secondary metabolites	ko01100//Metabolic pathways;ko01110//Biosynthesis of secondary metabolites;ko00941//Flavonoid biosynthesis	K13082;K13082;K13082	GO:0031312//extrinsic component of organelle membrane	GO:0016616//oxidoreductase activity, acting on the CH-OH group of donors, NAD or NADP as acceptor;GO:0048037//cofactor binding	GO:0009411//response to UV;GO:0009813//flavonoid biosynthetic process;GO:0034285//response to disaccharide;GO:0044710//single-organism metabolic process
CIL0526S0001	y	92.44	77.49	76.7	85.83	96.3	106.71	35.41	31.86	33.54	6.05	19.8	11.44	60.15	21.24	42.63	167.47	151.6	135.37	45.56	45.25	42.55	64.96	62.63	61.97	30.2	20.15	25.68	8.39	6.46	4.25	ANS	PREDICTED: leucoanthocyanidin dioxygenase [Juglans regia]	Metabolism;Metabolism;Metabolism	Global and overview maps;Global and overview maps;Biosynthesis of other secondary metabolites	ko01100//Metabolic pathways;ko01110//Biosynthesis of secondary metabolites;ko00941//Flavonoid biosynthesis	K05277;K05277;K05277	-	GO:0016706//oxidoreductase activity, acting on paired donors, with incorporation or reduction of molecular oxygen, 2-oxoglutarate as one donor, and incorporation of one atom each of oxygen into both donors;GO:0019842//vitamin binding;GO:0043169//cation binding	GO:0009699//phenylpropanoid biosynthetic process;GO:0009813//flavonoid biosynthetic process
CIL1099S0044	y	94.08	123.3	125.24	60.76	43.02	82.46	46.63	51.67	52.58	43.2	53.84	50.04	87.79	86.98	80.36	154.66	145.1	136.92	41.39	37.73	39.61	129.61	125.88	130.19	73.9	51.09	61.34	18.62	15.78	11.64	ANR	PREDICTED: anthocyanidin reductase [Juglans regia]	Metabolism;Metabolism	Global and overview maps;Biosynthesis of other secondary metabolites	ko01110//Biosynthesis of secondary metabolites;ko00941//Flavonoid biosynthesis	K08695;K08695	-	GO:0016628//oxidoreductase activity, acting on the CH-CH group of donors, NAD or NADP as acceptor;GO:0048037//cofactor binding	GO:0009812//flavonoid metabolic process;GO:0009890//negative regulation of biosynthetic process;GO:0044710//single-organism metabolic process
CIL0899S0128	y	97.15	50.02	65.62	3.09	1.8	6.96	2.96	3.11	2.82	1.17	2.76	2.04	21.33	22.53	18.79	40.7	39.5	41.98	9.62	11.79	10.34	13.42	11.08	11.52	10.76	6.81	6.54	10.71	8.4	8.5	LAR	PREDICTED: leucoanthocyanidin reductase-like [Juglans regia]	Metabolism;Metabolism	Global and overview maps;Biosynthesis of other secondary metabolites	ko01110//Biosynthesis of secondary metabolites;ko00941//Flavonoid biosynthesis	K13081;K13081	-	-	-
CIL0908S0132	y	12.1	15.86	12.84	4.13	4.06	6.39	0.48	0.39	0.51	0.07	0.11	0.09	3.16	0.74	2.28	18.29	18.04	15.92	0.7	0.73	0.66	0.71	0.37	0.56	0.33	0.43	0.27	0.81	0.75	1.21	LAR	PREDICTED: leucoanthocyanidin reductase-like [Juglans regia]	Metabolism;Metabolism	Global and overview maps;Biosynthesis of other secondary metabolites	ko01110//Biosynthesis of secondary metabolites;ko00941//Flavonoid biosynthesis	K13081;K13081	-	-	-
CIL1032S0007	y	10.1	8.29	8.17	10.86	13.14	8.21	3.63	3.01	3.28	9.01	8.74	9.06	11.09	12.69	10.63	24.7	19.94	20.56	5.81	5.46	5.63	33.28	31.62	31.31	12.9	13.37	12.35	21.45	23.93	20.13	LAR	PREDICTED: leucoanthocyanidin reductase-like [Juglans regia]	Metabolism;Metabolism	Global and overview maps;Biosynthesis of other secondary metabolites	ko01110//Biosynthesis of secondary metabolites;ko00941//Flavonoid biosynthesis	K13081;K13081	-	-	-
CIL1060S0045	n	0	0	0	0.08	0.11	0	0.34	0.42	0.24	0.07	0	0.07	0	0	0	0	0	0	0.55	0.34	0.32	0	0	0	0	0	0	0	0	0	FLS	PREDICTED: flavonol synthase/flavanone 3-hydroxylase-like [Juglans regia]	Metabolism;Metabolism;Metabolism	Global and overview maps;Global and overview maps;Biosynthesis of other secondary metabolites	ko01100//Metabolic pathways;ko01110//Biosynthesis of secondary metabolites;ko00941//Flavonoid biosynthesis	K05278;K05278;K05278	-	GO:0016705//oxidoreductase activity, acting on paired donors, with incorporation or reduction of molecular oxygen;GO:0043169//cation binding	GO:0044710//single-organism metabolic process
CIL0302S0003	n	0	0	0.05	0	0	0	0	0	0	0	0	0	0	0	0	0	0	0.07	0	0	0	0	0	0	0	0	0	0	0	0	FLS	PREDICTED: flavonol synthase/flavanone 3-hydroxylase-like [Juglans regia]	Metabolism;Metabolism;Metabolism	Global and overview maps;Global and overview maps;Biosynthesis of other secondary metabolites	ko01100//Metabolic pathways;ko01110//Biosynthesis of secondary metabolites;ko00941//Flavonoid biosynthesis	K05278;K05278;K05278	-	GO:0016705//oxidoreductase activity, acting on paired donors, with incorporation or reduction of molecular oxygen;GO:0043169//cation binding	GO:0044710//single-organism metabolic process
CIL1060S0040	y	3.34	3.67	3.17	2.07	1.93	1.46	5.65	6.03	5.68	0.35	0.24	0.58	0.04	0	0.19	0.24	0.34	0.43	10.79	10.25	10.32	0.33	0.26	0.54	0.23	0.34	0.17	0	0.07	0	FLS	PREDICTED: flavonol synthase/flavanone 3-hydroxylase-like [Juglans regia]	Metabolism;Metabolism;Metabolism	Global and overview maps;Global and overview maps;Biosynthesis of other secondary metabolites	ko01100//Metabolic pathways;ko01110//Biosynthesis of secondary metabolites;ko00941//Flavonoid biosynthesis	K05278;K05278;K05278	-	GO:0016706//oxidoreductase activity, acting on paired donors, with incorporation or reduction of molecular oxygen, 2-oxoglutarate as one donor, and incorporation of one atom each of oxygen into both donors;GO:0043169//cation binding	GO:0051553//flavone biosynthetic process
MSTRG.14283	n	0.05	0.08	0.11	0.3	0.07	0.22	0.06	0	0	0.23	0.16	0.58	0.07	0.27	0.11	1.67	0.8	1.62	0.4	0.46	0.42	0.93	0.59	0.68	0.23	0.69	0.09	0	0	0.1	FLS	PREDICTED: flavonol synthase/flavanone 3-hydroxylase-like [Juglans regia]	Metabolism;Metabolism;Metabolism	Global and overview maps;Global and overview maps;Biosynthesis of other secondary metabolites	ko01100//Metabolic pathways;ko01110//Biosynthesis of secondary metabolites;ko00941//Flavonoid biosynthesis	K05278;K05278;K05278	-	GO:0016705//oxidoreductase activity, acting on paired donors, with incorporation or reduction of molecular oxygen;GO:0043169//cation binding	GO:0044710//single-organism metabolic process
